# Supplementary material for: Wolbachia action in the sperm produces developmentally deferred chromosome segregation defects during the Drosophila mid-blastula transition
Source: eLife. 2022 Sep 23;11:e81292. doi: 10.7554/eLife.81292 (PMC9507124; doi:10.7554/eLife.81292)
Supplement: Figure 5—source data 2. — Numerical data used to create Figure 5E. [file elife-81292-fig5-data2.xlsx]

## Sheet: Sheet1
Genotype	TOTAL	RANDOM	EGFP	kl-5 (Y)	Ppr-Y (Y)	PRY (Y)	CCY (Y)	ORY (Y)	vermillion (X)	drak (X)	Imp (X)	Mur2B (X)	Flo2 (X)	daughterless (2L)	Bru1 (2L)	RapGAP1 (2L)	Trim9 (2L)	Lar (2L)	BubR1 (2R)	apterous (2R)	vestigial (2R)	plexus (2R)	cap (2R)	Cyclin A (3L)	sprouty (3L)	big bang (3L)	knirps (3L)	henna (3L)	Ultrabithorax (3R)	antennapedia (3R)	stubby (3R)	branchless (3R)	wide awake (3R)	eyeless (4)	shaven (4)	pmca (4)	toy (4)	fuss (4)
Rescue	141.967	0	83.068	0.636	0.398	0	2.514	0.642	180.337	175.86	148.065	114.958	119.691	140.728	125.737	132.216	148.398	145.965	162.122	141.817	138.231	162.441	171.932	180.678	113.871	137.439	120.854	167.681	130.073	130.544	141.141	141.811	150.369	120.76	128.956	142.068	115.188	134.029
WT	98.844	0.291	0	32.052	49.25	49.897	37.904	44.988	55.473	28.037	57.604	45.34	44.308	96.295	94.271	92.826	116.795	114.098	116.973	113.388	115.516	119.465	117.52	119.905	97.676	100.248	122.229	115.772	98.523	94.629	109.603	98.901	106.326	106.249	106.607	115.657	96.59	116.01
CI	18.672	0	0	0.063	0.216	0.535	0	0.285	33.215	18.125	29.28	14.066	18.425	20.456	16.877	19.06	22.234	19.198	22.627	21.07	20.329	22.325	21.865	27.591	17.216	18.813	21.397	23.814	19.304	18.185	16.082	17.923	21.19	15.736	16.884	25.238	15.99	19.568
CI	51.045	0	26.866	0	0	0	0	0.112	67.712	49.669	57.868	39.491	44.447	56.977	47.195	49.148	53.995	52.276	60.326	60.326	57.47	57.732	56.089	55.718	43.603	53.008	59.714	57.656	54.304	53.568	54.542	51.463	51.143	43.96	50.639	54.016	41.87	42.758
CI	51.026	0	22.074	0.0249	0.045	0	0	0.154	64.372	51.206	55.253	40.872	44.405	64.149	43.558	50.856	53.757	54.219	59.798	59.754	59.25	60.552	58.079	40.105	42.654	54.524	59.437	51.545	55.251	54.237	61.479	52.234	52.397	44.327	51.876	56.998	42.457	46.331
CI	51.109	0	1.277	0.25	0	0	0	0	61.83	66.301	58.445	38.392	40.995	60.512	42.952	48.999	53.958	53.98	60.465	55.538	57.564	58.622	57.552	67.641	41.786	53.092	55.754	56.082	56.453	55.297	56.762	52.108	50.675	47.621	47.245	58.821	46.433	45.697
CI	50.841	0	0.843	0	0.091	0.062	0	0	52.856	55.654	58.351	38.341	43.732	56.209	46.205	48.518	53.944	51.753	58.503	53.944	57.229	57.998	54.382	58.914	43.345	52.757	56.534	57.046	53.623	52.628	55.876	51.489	48.59	44.445	53.447	52.583	42.659	44.911
CI	51.173	0	48.029	21.271	24.148	29.724	28.756	13.933	33.649	30.941	34.232	23.241	23.005	63.352	49.776	51.639	59.574	57.587	62.526	66.651	60.067	66.465	67.04	80.778	48.283	55.66	62.201	66.623	59.141	58.115	61.556	55.995	57.24	43.165	43.165	52.557	40.989	50.375
CI	49.933	0	2.95	0.63	0.45	0	0	0.532	59.582	52.221	53.035	37.626	41.244	55.009	43.466	46.791	51.798	49.951	59.115	55.019	54.718	55.195	53.481	36.518	40.729	50.868	58.146	48.891	53.239	50.913	52.947	48.711	50.631	43.017	46.903	54.308	42.055	45.178
CI	51.108	0	0.84	0.241	0	0	0	0	61.641	56.11	60.49	42.155	44.637	58.761	48.007	58.089	56.03	54.295	61.454	58.386	56.469	60.019	58.355	52.509	46.95	53.783	63.566	56.057	55.162	55.503	58.197	54.114	50.609	45.83	48.089	57.172	43.829	44.527
CI	49.943	0	29.045	21.133	24.631	20.905	24.536	25.482	31.612	42.132	28.428	19.61	22.247	56.883	44.649	48.11	51.599	49.364	56.6	56.655	56.415	57.641	51.807	54.909	41.322	50.725	57.673	53.29	52.11	50.178	56.047	47.57	50.708	41.382	48.048	52.243	39.958	47.484
CI	51.16	0	34.158	0	0	0.301	0	0	59.825	56.059	60.036	40.29	45.481	61.213	48.013	48.446	55.239	51.932	59.569	54.544	55.936	57.504	59.134	55.404	43.837	53.361	59.428	60.203	54.879	55.006	56.923	52.678	52.132	44.665	50.32	55.726	42.042	48.392
CI	51.78	0	2.014	0.353	0	0.531	0	0	56.744	48.61	58.004	40.139	45.769	58.423	46.106	51.92	55.951	52.787	59.22	58.177	55.504	61.714	61.267	60.009	44.013	54.064	55.371	52.532	55.333	55.047	57.709	52.152	53.165	40.767	52.002	56.733	40.138	44.383
CI	51.552	0	24.846	25.595	34.663	19.702	23.303	31.628	24.821	44.199	32.203	20.967	24.693	63.601	49.018	52.946	56.077	54.919	56.512	57.78	61.964	61.054	56.329	62.577	45.94	56.59	58.839	63.698	56.845	55.586	57.502	53.274	52.852	51.838	58.084	62.475	48.947	56.808
CI	52.348	0	1.361	0.16	0	0	0	0	68.415	49.434	64.942	42.525	42.051	71.279	38.702	56.774	55.268	57.212	68.678	66.36	67.926	65.36	56.583	65.864	49.357	59.284	56.23	46.168	61.471	60.99	62.277	55.304	60.148	51.421	56.331	62.987	49.998	49.287
